# Supplementary material
Source: PubMed Central journal article supplement (PMC7790091)

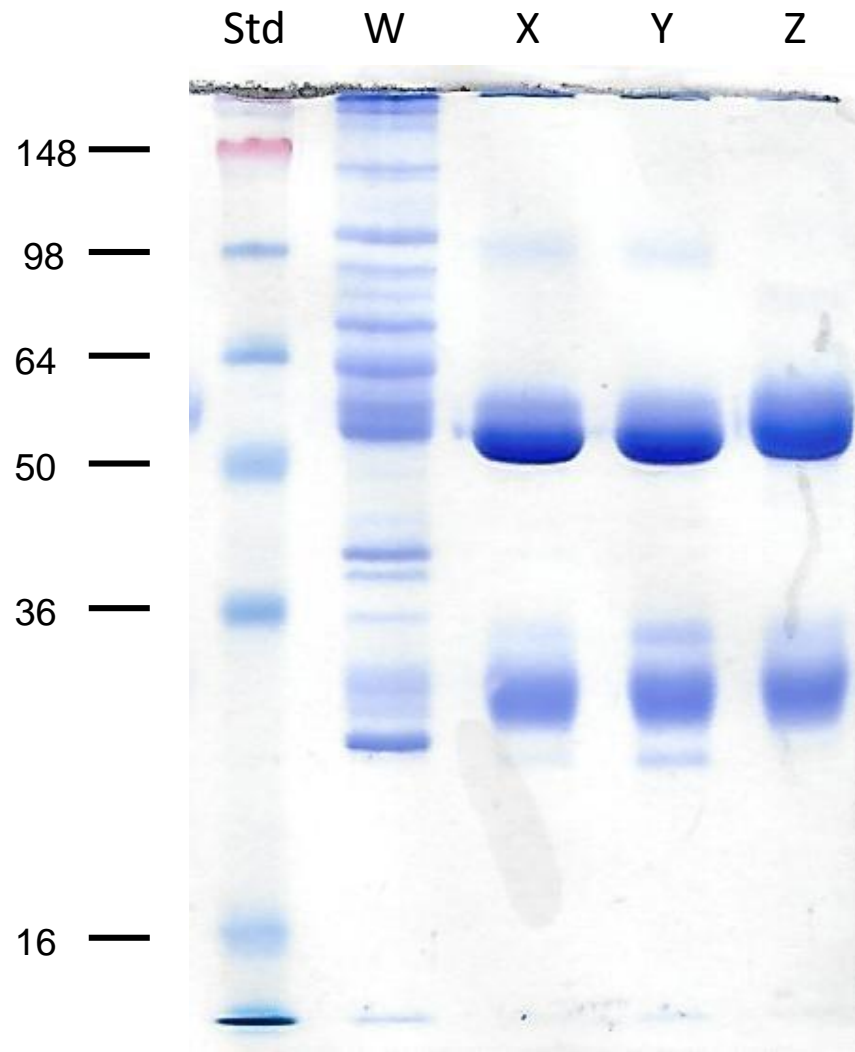

MWapp (kDa)

# Dog IgG responses to HSPs measured by multiplex bead assay

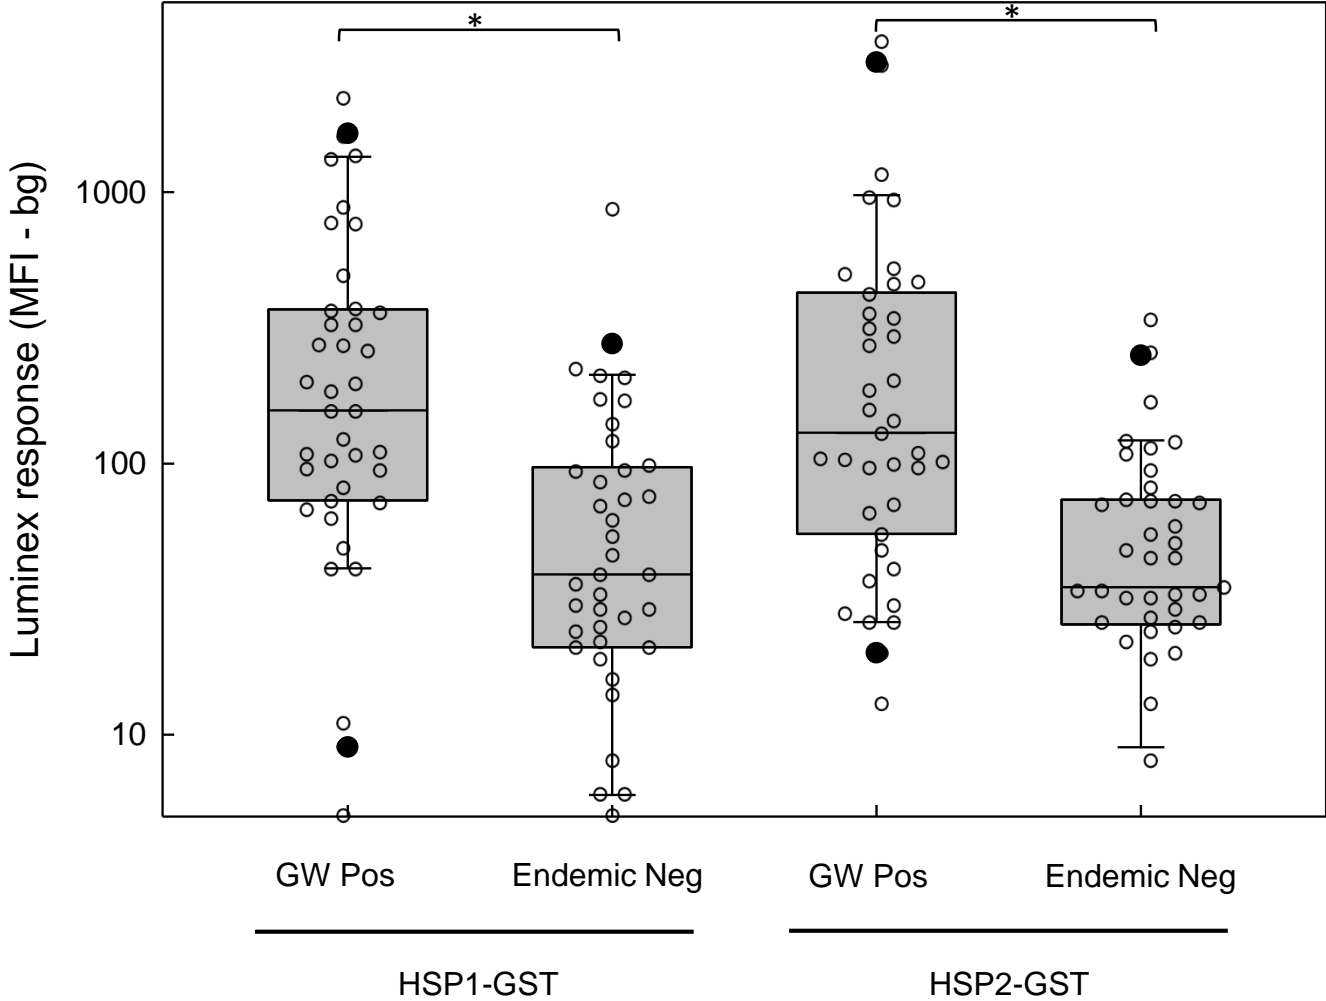

# HSP1-GST assay ROC curves

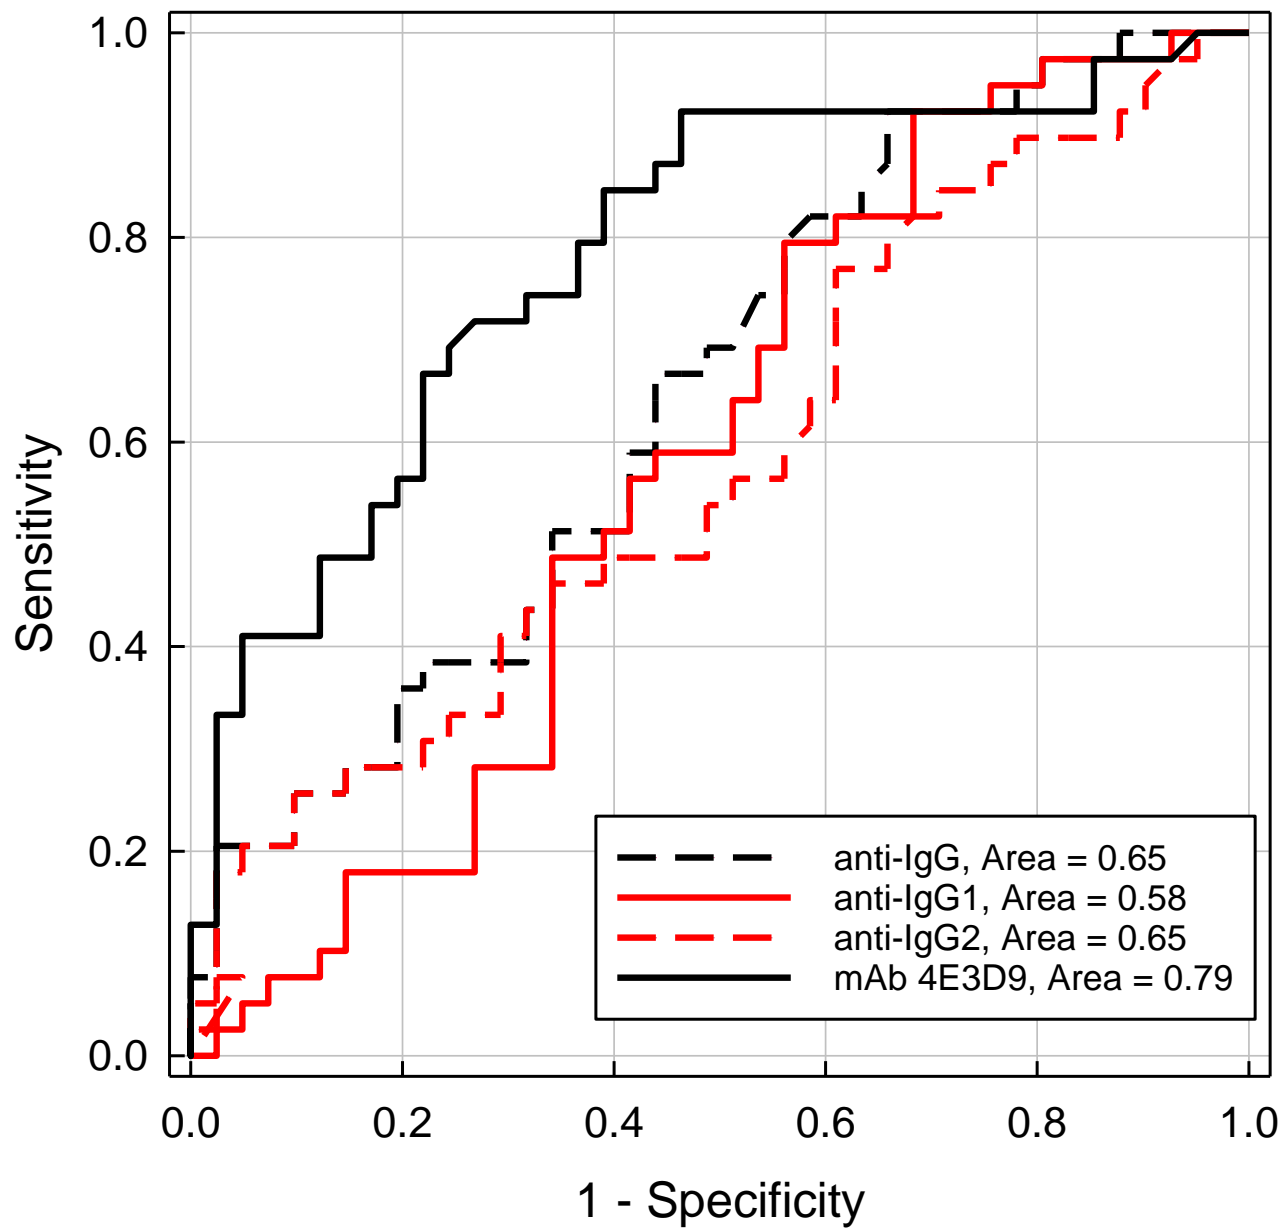

# HSP2-GST assay ROC curves

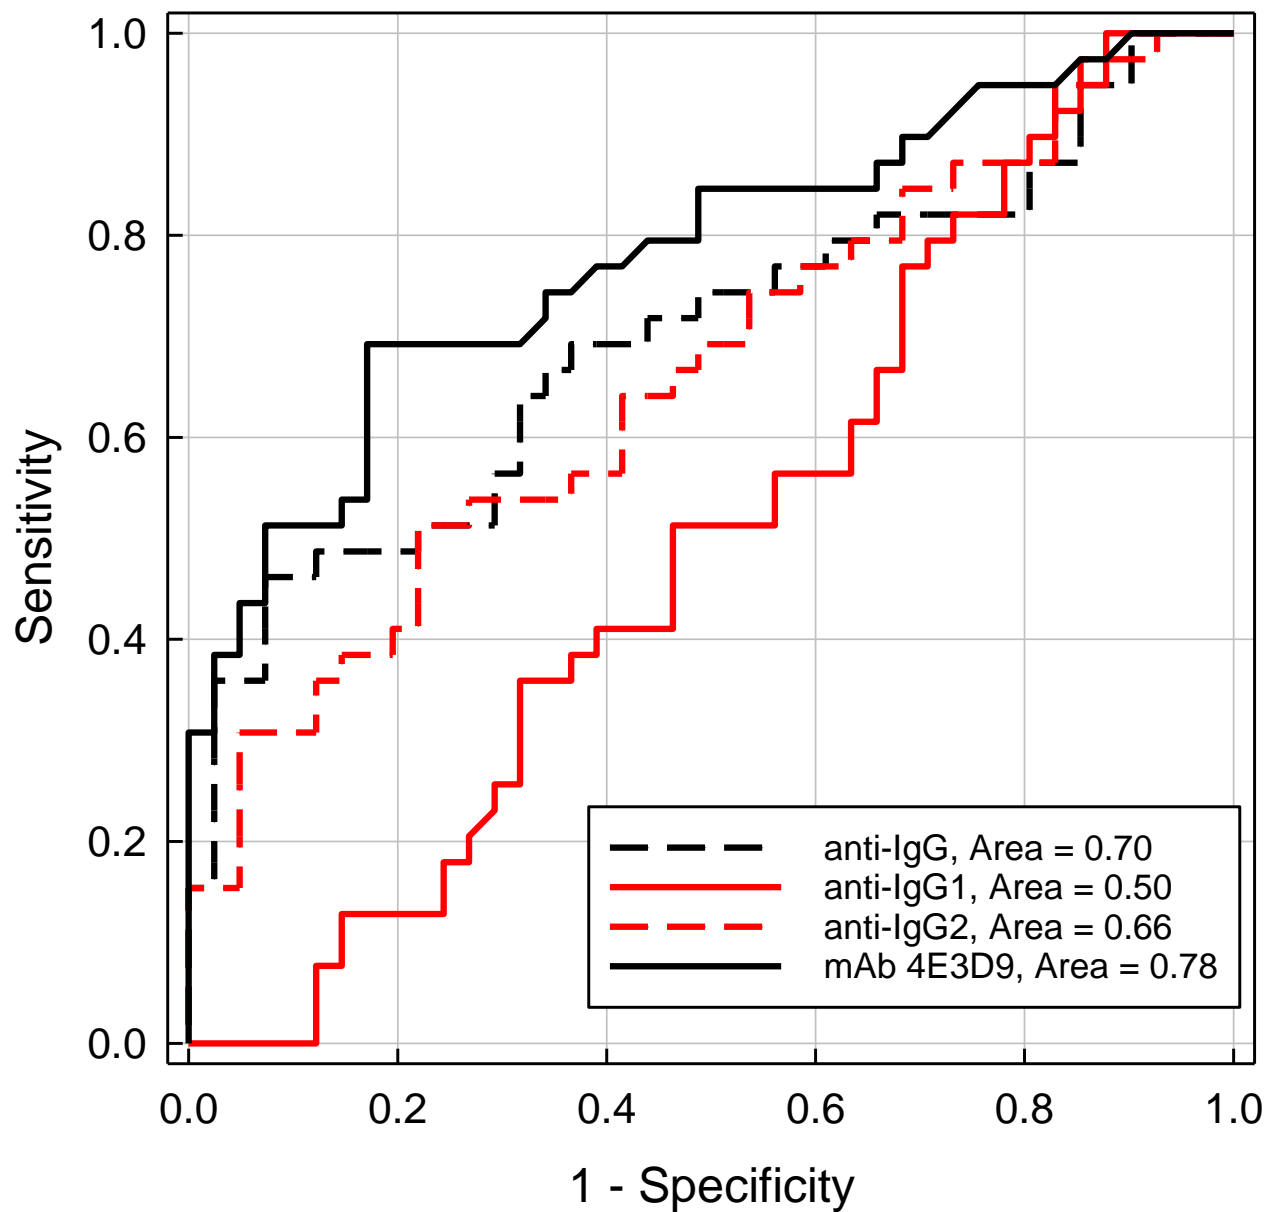

Supplement: tpmd200914.SD1.pdf [file tpmd200914.SD1.pdf]
