# Supplementary material
Source: PubMed Central journal article supplement (PMC7790091)
Supplement: tpmd200914.SD2.pdf [file tpmd200914.SD2.pdf]

**Supplemental Figure 1.** SDS polyacrylamide gel of fractionated canine immunoglobulins. Immunoglobulin fractions were analyzed by SDS polyacrylamide gel electrophoresis by the method of Laemmli<sup>15</sup> on a 10.5% acrylamide gel loaded with 10.5 µg of protein per lane. The gel was stained with Coomassie Brilliant Blue R-250. Immunoglobulin fractions are labelled W, X, Y, and Z according to the convention of Mazza et al.<sup>14</sup> SeeBlue Plus2 prestained markers (ThermoFisher Scientific) were run in the lane marked 'Std'. The apparent molecular weights (MW<sub>app</sub>) are indicated on the left.

**Supplemental Figure 2.** Multiplex bead assay detection of antibodies to recombinant HSP1-GST and HSP2-GST fusion proteins. Multiplex bead assays were conducted as described in the Materials and Methods using magnetic beads covalently coated with either HSP1-GST (left) or HSP2-GST (right). Biotinylated monoclonal secondary antibody 4E3D9 was used to detect responses in sera from dogs previously infected with GW ( $n = 39$ ) or in dog sera from a non-endemic region of Chad ( $n = 41$ ). Individual values are indicated by open circles. Note that two negative values for the HSP1-GST assay and three negative values for the HSP2-GST assay are not plotted as they fell below the range of the graph. Boxes include values between the 25<sup>th</sup> and 75<sup>th</sup> percentiles. Whiskers and closed circles represent the 10<sup>th</sup> and 90<sup>th</sup> and the 5<sup>th</sup> and 95<sup>th</sup> percentiles, respectively. Median values are indicated by a horizontal line within the boxes. Distributions that show statistically significant differences ( $P < 0.05$ ) using the Kruskal-Wallis one-way analysis of variance on ranks are indicated by brackets with asterisks.

**Supplemental Figure 3.** Receiver-operating characteristic (ROC) curve results of responses from HSP1-GST multiplex bead assays using different detection reagents. Curves were constructed using MFI-bg responses of samples collected from individuals with previous GW infection ( $n = 39$ ) or from individuals from a non-endemic region of Chad ( $n = 41$ ). Antibody responses were detected with either an anti-IgG Fc polyclonal antibody (anti-IgG, black dashed line), an anti-IgG<sub>1</sub> polyclonal antibody (anti-IgG<sub>1</sub>, red line), an anti-IgG<sub>2</sub> monoclonal antibody (anti-IgG<sub>2</sub>, red dashed line), or the 4E3D9 monoclonal antibody (anti-IgG<sub>4</sub>, black line) as described in the Materials and Methods section. The optimal threshold for the HSP1-GST assay with the 4E3D9 antibody was 94.5 MFI-bg with a sensitivity of 71.8% and a specificity of 73.2%.

**Supplemental Figure 4.** ROC curve results of responses from HSP2-GST multiplex bead assays using different detection reagents. Curves were constructed as described in Supplemental Figure 3. The optimal threshold for the HSP2-GST assay with the 4E3D9 antibody was 96 MFI-bg with a sensitivity of 69.2% and a specificity of 82.9%.
