# Supplementary material
Source: PubMed Central journal article supplement (PMC7790091)
Supplement: tpmd200914.SD3.pdf [file tpmd200914.SD3.pdf]

| Primary antibody        | Rabbit anti-IgG Fc | Goat anti-IgG <sub>1</sub> | anti-IgG <sub>2</sub> mAb | 4E3D9 mAb |
|-------------------------|--------------------|----------------------------|---------------------------|-----------|
| Chad negative dog serum | 1,622              | 21,690                     | 661                       | 76        |
| Chad positive dog serum | 23,042             | 29,442                     | 980                       | 26,235    |
| IgG Fraction W          | 1,559              | 22,833                     | 43                        | 5,087     |
| IgG Fraction X          | 28,893             | 16,693                     | 28,189                    | 2,171     |
| IgG Fraction Y          | 11,007             | 15,633                     | 6,951                     | 3,072     |
| IgG Fraction Z          | 22,437             | 29,575                     | 2,043                     | 25,298    |

**Supplemental Table 1. Reactivity (in MFI-bg units) of canine serum fractions with GW TRXL1 antigen by multiplex bead assay.**

| Primary antibody        | Rabbit anti-IgG Fc | Goat anti-IgG <sub>1</sub> | anti-IgG <sub>2</sub> mAb | 4E3D9 mAb |
|-------------------------|--------------------|----------------------------|---------------------------|-----------|
| Chad negative dog serum | 997                | 20,993                     | 375                       | 82        |
| Chad positive dog serum | 1,340              | 19,339                     | 350                       | 1,664     |
| IgG Fraction W          | 37                 | 333                        | 16                        | 23        |
| IgG Fraction X          | 654                | 50                         | 303                       | 8         |
| IgG Fraction Y          | 1057               | 125                        | 510                       | 26        |
| IgG Fraction Z          | 237                | 3,348                      | 46                        | 356       |

**Supplemental Table 2. Reactivity (in MFI-bg units) of canine serum fractions with GW HSP1 antigen by multiplex bead assay.**

| Primary antibody        | Rabbit anti-IgG Fc | Goat anti-IgG <sub>1</sub> | anti-IgG <sub>2</sub> mAb | 4E3D9 mAb |
|-------------------------|--------------------|----------------------------|---------------------------|-----------|
| Chad negative dog serum | 1,062              | 14,461                     | 409                       | 35        |
| Chad positive dog serum | 1,324              | 22,205                     | 369                       | 728       |
| IgG Fraction W          | 79                 | 739                        | 26                        | 121       |
| IgG Fraction X          | 1,845              | 233                        | 857                       | 46        |
| IgG Fraction Y          | 14,277             | 730                        | 9,001                     | 95        |
| IgG Fraction Z          | 991                | 10,100                     | 179                       | 1,454     |

**Supplemental Table 3. Reactivity (in MFI-bg units) of canine serum fractions with GW HSP2 antigen by multiplex bead assay.**

|                         |     |       |     |    |
|-------------------------|-----|-------|-----|----|
| Chad negative dog serum | 181 | 2,694 | 68  | 9  |
| Chad positive dog serum | 181 | 4,811 | 63  | 7  |
| IgG Fraction W          | 8   | 80    | 0   | 7  |
| IgG Fraction X          | 287 | 21    | 143 | 0  |
| IgG Fraction Y          | 153 | 76    | 72  | 8  |
| IgG Fraction Z          | 36  | 415   | 7   | 44 |

**Supplemental Table 4. Reactivity (in MFI-bg units) of canine serum fractions with GST negative control protein by multiplex bead assay.**
